# Supplementary material
Source: JCI journal article supplement (doi:10.1172/jci.insight.198895)
Supplement: sd1 [file 1]

1 Supplemental figures

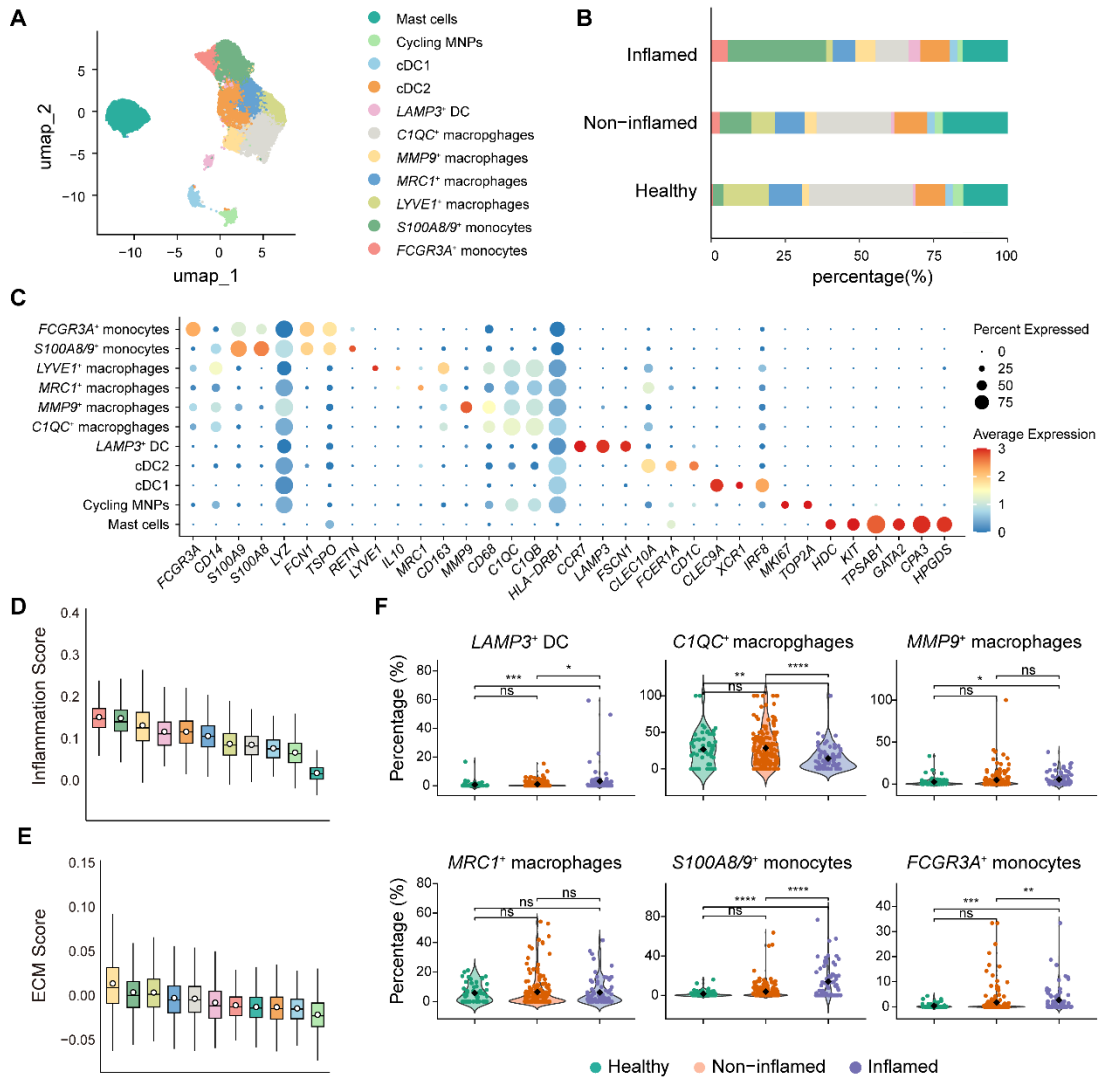

2  
3 **Supplemental Figure 1. Myeloid cell subclusters in the inflamed intestine of IBD.**  
4 (A) UMAP plot showing 11 myeloid cell subclusters from the integrated scRNA-seq  
5 dataset, including 4,141 cells from the healthy control group, 10,562 from the non-  
6 inflamed group, and 18,827 from the inflamed group, totaling 33,530 cells.  
7 (B) Bar graph showing the proportions of 11 myeloid cell subclusters across the  
8 inflamed, non-inflamed, and healthy control groups.  
9 (C) Dot plot showing the characteristic marker genes for each myeloid cell subcluster.  
10 Dot color and size respectively represent average expression level and expression  
11 percentage.  
12 (D-E) Box plots showing the inflammation scores (D) and ECM scores (E) for each  
13 myeloid cell subcluster. Median, quartiles, and range are shown.  
14 (F) Proportion of *LAMP3*<sup>+</sup> DC, *C1QC*<sup>+</sup> macrophages, *MMP9*<sup>+</sup> macrophages, *MRC1*<sup>+</sup>  
15 macrophages, *S100A8/9*<sup>+</sup> monocytes, and *FCGR3A*<sup>+</sup> monocytes in the healthy  
16 control, non-inflamed, and inflamed groups. Statistical significance was determined  
17 by Wilcoxon rank-sum test (ns: p > 0.05; \*: p ≤ 0.05; \*\*: p ≤ 0.01; \*\*\*: p ≤ 0.001;

18 \*\*\*\*:  $p \leq 0.0001$ ).

19

20

21

22

23

24

25

26

27

28

29

30

31

32

33

34

35

36

37

38

39

40

41

42

43

44

45

46

47

48

49

50

51

52

53

54

55

56

57

58

59

60

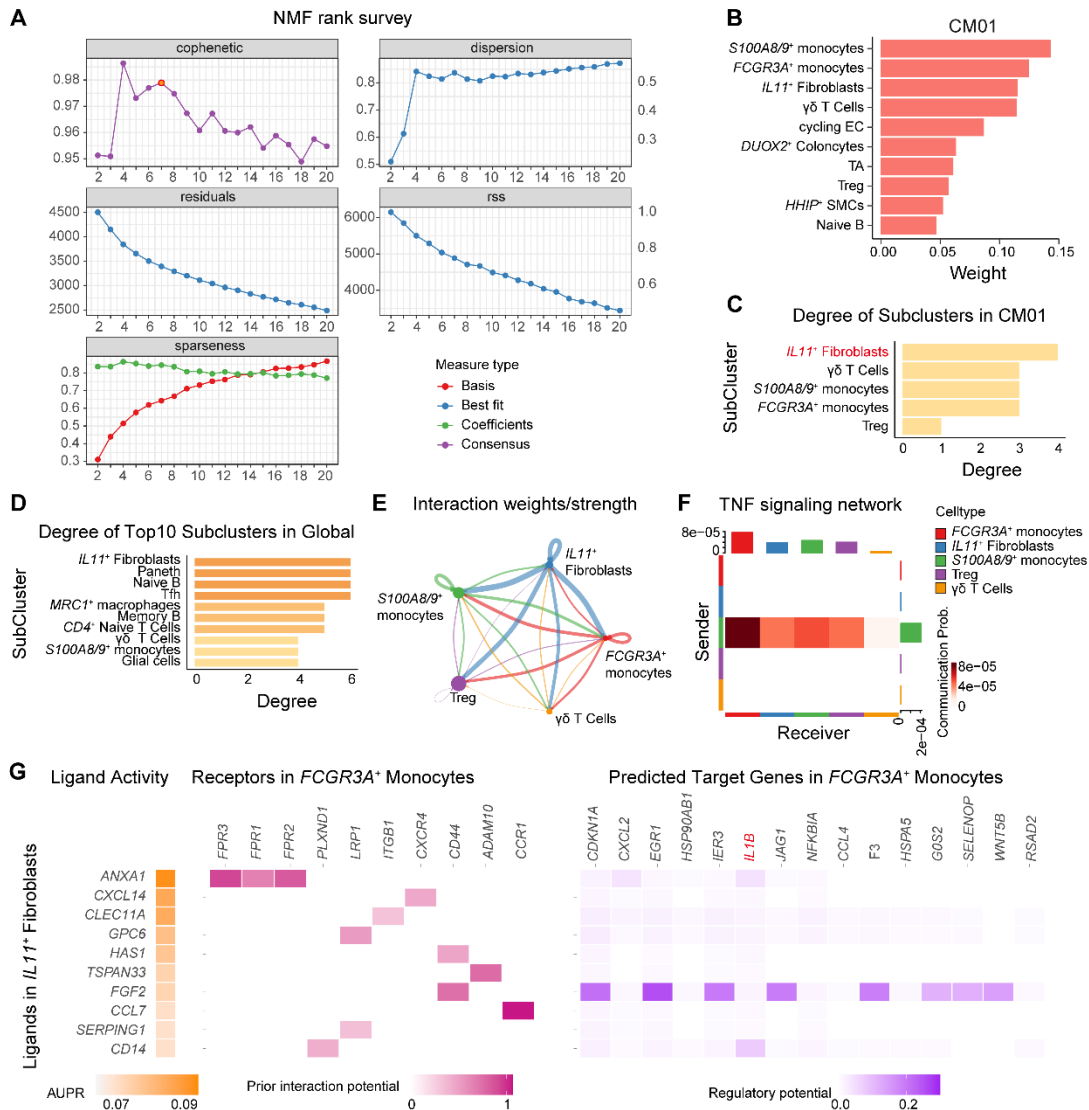

61

62 **Supplemental Figure 2. An *IL11*<sup>+</sup> fibroblast-centric CM and its internal**  
 63 **interaction network.**

64 (A) Line graphs showing the NMF rank survey in CoVarNet analysis. Parameters  
 65 displayed include cophenetic, dispersion, residuals, residual sum of squares (RSS),  
 66 and sparseness.

67 (B) Bar graphs showing the module weight calculated by NMF of subclusters in  
 68 CM01.

69 (C-D) Bar graph showing the degree (number of associations with other subclusters in  
 70 the module) of subclusters in CM01 (C) and the top 10 subclusters in global  
 71 interaction network (D).

72 (E) Network graph showing the interaction among core subclusters in CM01. Line  
 73 number represents the number of associations, and line thickness represents the  
 74 strength of associations.

75 (F) Heatmap showing the interaction strength in TNF signaling pathway among the  
 76 five core cell subclusters of CM01.

77 (G) Heatmap displaying the top-ranked ligand-receptor pairs inferred by NicheNet for

78 *IL11*<sup>+</sup> fibroblasts regulating *FCGR3A*<sup>+</sup> monocytes. The left panel shows the activity  
79 of top-ranked ligands from *IL11*<sup>+</sup> fibroblasts and their interaction strength with  
80 potential receptors on *FCGR3A*<sup>+</sup> monocytes; the right panel shows the downstream  
81 target genes in *FCGR3A*<sup>+</sup> monocytes. The meaning represented by different grid  
82 colors is shown at the bottom of the figure.

83  
84  
85  
86  
87  
88  
89  
90  
91  
92  
93  
94  
95  
96  
97  
98  
99  
100  
101  
102  
103  
104  
105  
106  
107  
108  
109  
110  
111  
112  
113  
114  
115  
116  
117  
118  
119  
120

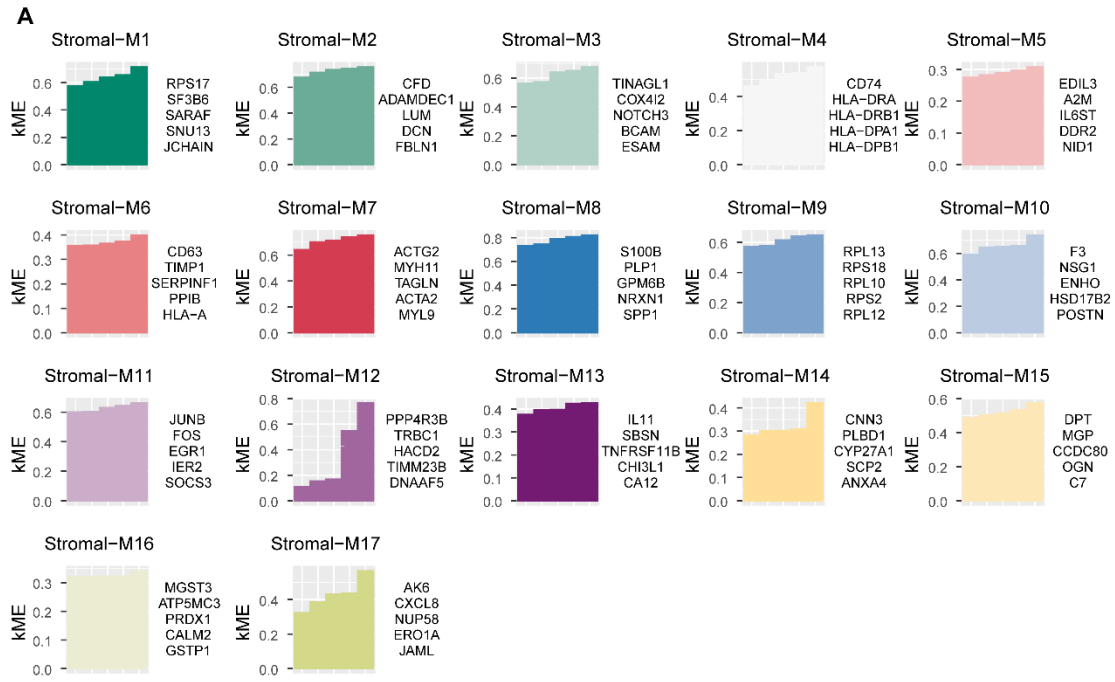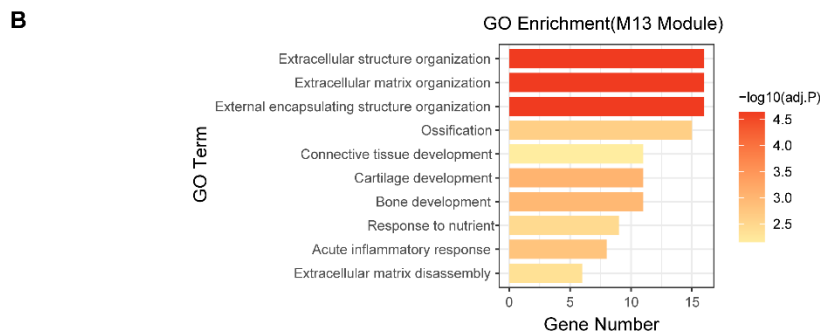

121  
 122 **Supplemental Figure 3. hdWGCNA reveals characteristic stromal-associated**  
 123 **gene modules in IBD.**

124 (A) Ranking and kME values of the top5 genes within stromal-M1-17.  
 125 (B) Representative GO enrichment analysis for the genes of stromal-M13. A  
 126 hypergeometric test was conducted using FDR-adjusted p values.

127  
 128  
 129  
 130  
 131  
 132  
 133  
 134  
 135  
 136  
 137

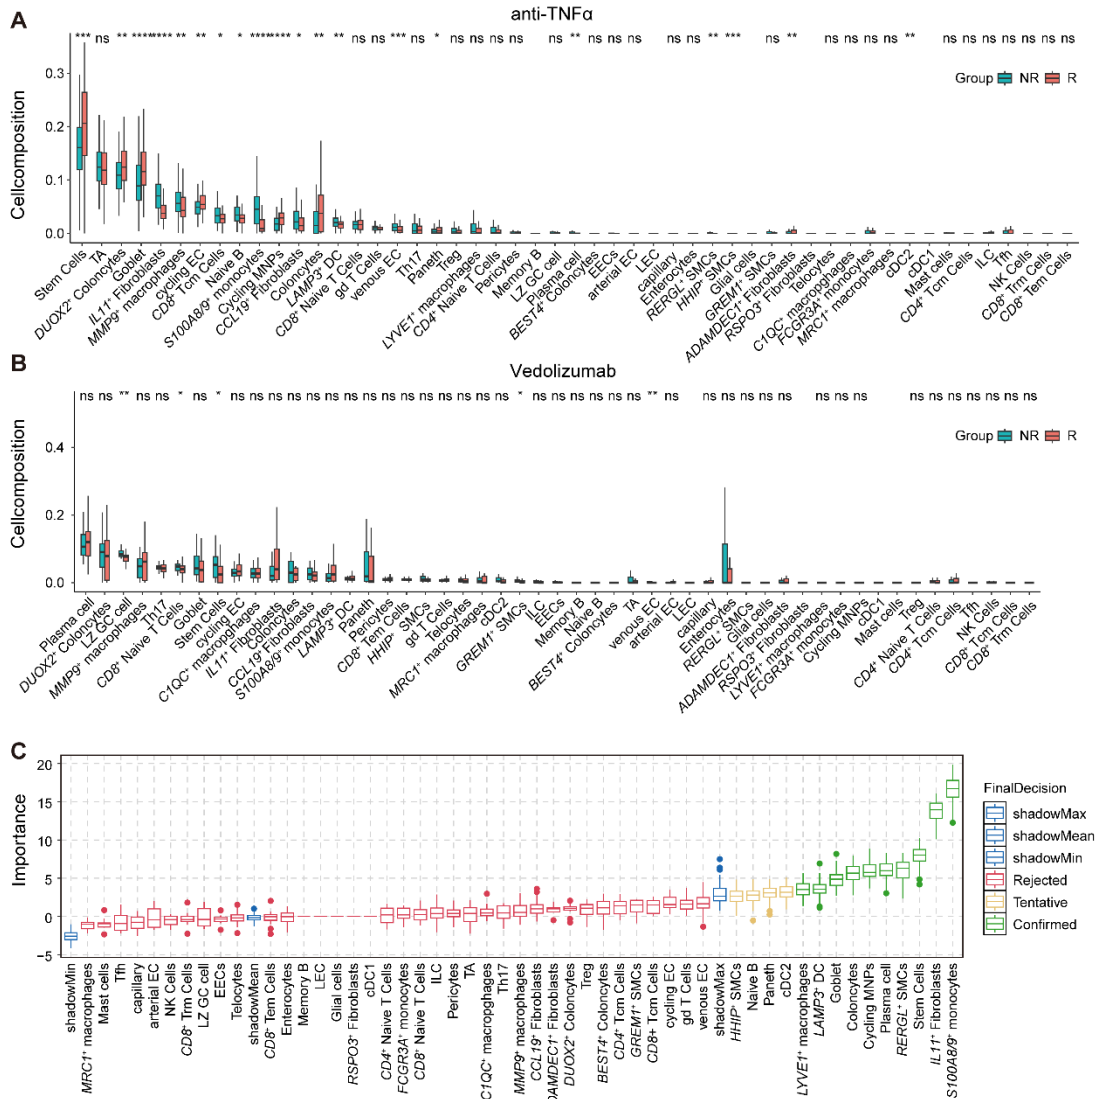

138  
 139  
 140  
 141  
 142  
 143  
 144  
 145  
 146  
 147  
 148  
 149  
 150  
 151  
 152  
 153  
 154

**Supplemental Figure 4. NR to anti-TNFα is potentially relative to *IL11*<sup>+</sup> fibroblasts.**

(A) Box plots showing the stromal cell composition calculated by CIBERSORT in the integrated bulk RNA-seq dataset and its distribution differences between non-responders and responders. Median, quartiles, and range are shown. Statistical significance was determined by Wilcoxon rank-sum test (ns:  $p > 0.05$ ; \*:  $p \leq 0.05$ ; \*\*:  $p \leq 0.01$ ; \*\*\*:  $p \leq 0.001$ ; \*\*\*\*:  $p \leq 0.0001$ ).

(B) Box plots showing the cellular composition calculated by CIBERSORT and its distribution differences between non-responders and responders. Median, quartiles, and range are shown. Statistical significance was determined by Wilcoxon rank-sum test (ns:  $p > 0.05$ ; \*:  $p \leq 0.05$ ; \*\*:  $p \leq 0.01$ ).

(C) NR-associated importance ranking via Boruta of different cells identified by CIBERSORT.

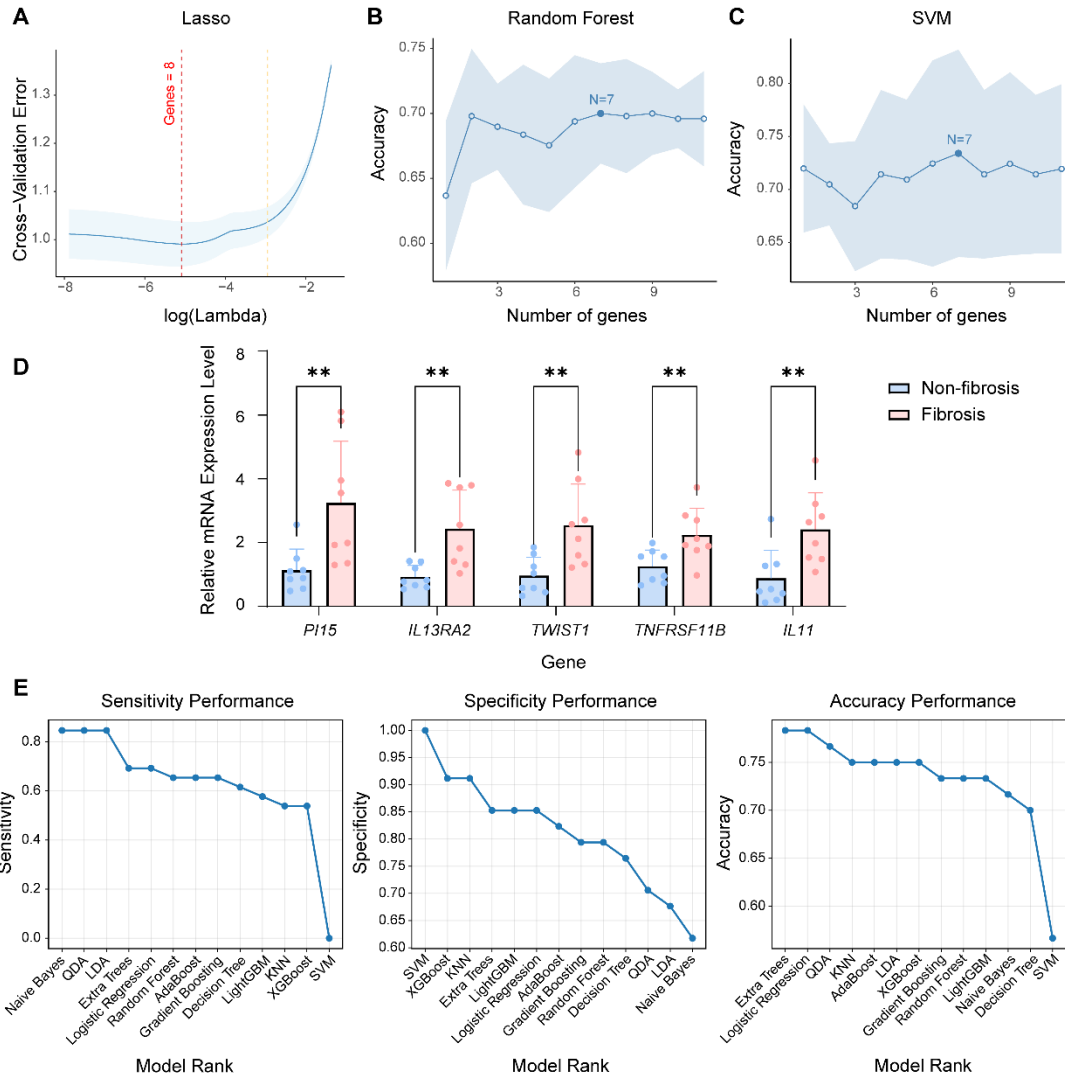

155  
 156  
 157  
 158  
 159  
 160  
 161  
 162  
 163  
 164  
 165  
 166  
 167  
 168  
 169  
 170  
 171

**Supplemental Figure 5. Development of a predictive model for NR to anti-TNF $\alpha$  based on *IL11*<sup>+</sup> fibroblasts.**

(A-C) The optimal number of key genes calculated by LASSO (A), RF (B) and SVM (C).

(D) Bar plots showing relative mRNA expression level of PI15, IL13RA2, TWIST1, TNFRSF11B, and IL11 in the paired fibrotic (n = 8) and non-fibrotic (n = 8) intestinal samples from eight CD patients. Data are presented as the mean  $\pm$  SD. Statistical significance was determined by paired Wilcoxon's rank-sum tests (\*\*:  $p \leq 0.01$ ).

(E) Line graphs showing the sensitivity, specificity, and accuracy of the 13 models established by KNN, RF, AdaBoost, Extra Trees, SVM, Logistic Regression, LDA, QDA, Naive Bayes, LightGBM, Gradient Boosting, XGBoost, and Decision Tree.

**A**

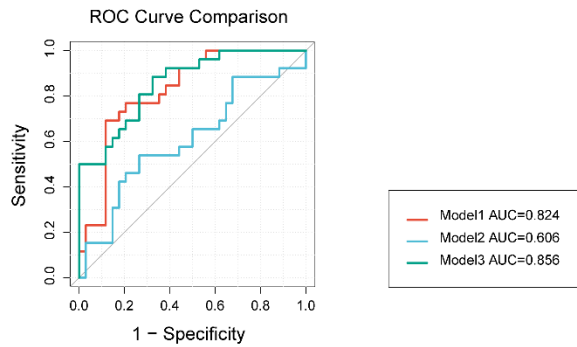

**B**

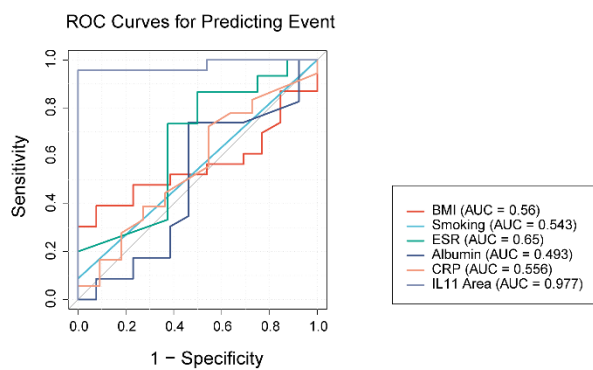

172

173 **Supplemental Figure 6. Superior performance of the *IL11*+ fibroblast-based**  
174 **predictive model compared with previously published models and clinical**  
175 **indicators.**

176 (A) ROC curves of Model1, 2, and 3 in the validation set. Corresponding model AUC  
177 values are listed on the right.

178 (B) ROC curves showing the predictive performance of BMI, Smoking, ESR, ALB,  
179 CRP, and IL11\_%Area in the clinical cohort comprising 36 CD patients undergoing  
180 surgical resection. Corresponding indicator AUC values are listed on the right.

181

182

183

184

185

186

187

188

## 189 Supplemental tables

## 190 Supplemental Table 1. Signature genes of. 1L11\_Fibro DEGs, M13 Module

## 191 Genes, and bulk DEGs in Figure 5A.

| Geneset             | Signature genes                                                                                                                                                                                                                                                                                                                                                                                                                                                                                                                                                                                                                                                                                                                                                                                                                                                                                                                                                                                                                                                                                                                                                                                                                                                                                                                                                             |
|---------------------|-----------------------------------------------------------------------------------------------------------------------------------------------------------------------------------------------------------------------------------------------------------------------------------------------------------------------------------------------------------------------------------------------------------------------------------------------------------------------------------------------------------------------------------------------------------------------------------------------------------------------------------------------------------------------------------------------------------------------------------------------------------------------------------------------------------------------------------------------------------------------------------------------------------------------------------------------------------------------------------------------------------------------------------------------------------------------------------------------------------------------------------------------------------------------------------------------------------------------------------------------------------------------------------------------------------------------------------------------------------------------------|
| 1L11_Fibro<br>DEGs  | <i>DCN, COL1A2, LUM, COL3A1, COL1A1, CIS, COL6A2, MMP2, COL6A1, RARRES2, CTSK, CIR, COL6A3, FBLN1, PCOLCE, IGFBP5, SERPINF1, NNMT, IGFBP4, SPON2, PTGDS, THY1, BGN, C11orf96, TGFBI, COL5A2, AEBP1, FSTL1, CXCL1, CHI3L1, PDPN, EFEMP2, IGFBP6, FGF7, COL12A1, CCL11, CTHRC1, ECM1, COL5A1, ANGPTL2, MXRA8, FBNI, TNC, ISLR, FKBP10, CXCL6, STEAP1, HTRA3, PTGES, PDGFRB, PDLIM4, FAM20C, MRGPRF, OLFML3, LOXL2, TNFAIP6, RCN3, ANTXR1, MASP1, CDH11, C3, FAP, LOXL1, COL7A1, WNT5A, CPXM1, THBS2, TNFRSF11B, TNFRSF12A, TDO2, MRC2, FIBIN, RAMPI, FBLN2, SPHK1, PTGSI, PRRX1, COL8A1, GLT8D2, GPX8, CLMP, BICC1, CRABP2, IL11, PRR16, TPST1, GUCY1A1, IL34, PTGFR, GLIS3, MMP1, MFAP2, PTHLH, LPAR1, PAPP, FAM20A, TWIST1, TFPI2, SRPX2, WNT2, OLFM1, AKR1C1, EML1, VASN, TMEM158, ADAMTS2, LOX, MMP3, TMEM132A, CD248, LSAMP, HGF, SGIP1, BNC2, TSPAN11, LAMC3, RIPOR3, TCEAL7, GASI, LTBP2, SBSN, PII5, LARP6, NFATC4, STC1, ACKR4, PAPLN, SDK1, HSD11B1, SSC5D, CXCL5, PRRX2, PODNL1, ROR2, S100A3, SNCAIP, CSF3, GALNT15, MEDAG, IL24, STRA6, SPOCK1, FNDC4, FAM110B, ARHGAP28, RASL12, SMOC1, IGDC4, P4HA3, CCN4, GPR176, NID2, ADAM33, FNDC1, RP11-166D19.1, ADAMTS12, GLI3, IL13RA2, RP11-125O18.1, NTN1, SFRP2, CYP26B1, BDKRB1, DNMI, TFAP2C, ASPHD1, CLIC6, PTPRN, FDCSP, SORCS2, AOX1, BHLHE22, EGFL6, TGFB3, TWIST2, RGS4, VGLL3, FST, RP11-588K22.2, DIO2</i> |
| M13 Module<br>Genes | <i>PDPN, ZCCHC17, SERINC2, CSMD2, CHI3L2, S100A2, CRABP2, RGS4, F5, PRRX1, RP1-79C4.4, FMO1, CHI3L1, IL10, C1orf115, RP11-400N13.3, CYP26B1, GNLY, CYTOR, IGKV1-12, IGKV1-9, IGKV2-24, STEAP3, KYNU, GALNT5, FAP, CHN1, DIRCI, IGFBP2, PTPRN, SLC19A3, MLPH, TWIST2, ANKRD28, GALNT15, COL7A1, CACNA2D3, ACKR4, MME, ECE2, NICOL1, FDCSP, CXCL5, CXCL3, EREG, CXCL13, ACSL1, ADAMTS12, IL7R, SLC1A3, LUCAT1, GLRX, PCSK1, TNFAIP8, SLC22A4, ATOX1, ELOVL2, CFB, UQCC2, HMGAI, SLC16A10, VNN1, SGK1, RP11-557H15.3, RP3-428L16.2, AGPAT4, TWIST1, INHBA, ASL, WNT2, EGFL6, GK, SRPX2, BGN, CSGALNACT1, SLC39A14, STC1, DUSP4, ANK1, PII5, CTHRC1, TNFRSF11B, CCN4, GLIS3, SEC61B, PRRX2, PTGES, ASS1, EGFL7, CD82,</i>                                                                                                                                                                                                                                                                                                                                                                                                                                                                                                                                                                                                                                                       |

---

*TMEM132A, SYT7, P4HA3, MMP1, MMP13, ADAM12, PTHLH, FKBP11, C12orf75, HPD, RUBCNL, TMEM255B, PTGDR, IGHG2, IGHG1, IGHG3, IGHV1-24, APBA2, CA12, STRA6, ISG20, TNFRSF12A, SEZ6L2, ASPHD1, COTL1, RP11-863P13.3, ADORA2B, RASD1, CSF3, ABCC3, NME1, ARSG, WIP11, FAM20A, CD300E, SPHK1, SLC16A3, TTC39C, CPXMI, SMOX, HCK, SULF2, TPM4, ARRDC2, SBSN, FPR1, IL11, MRAP, KCNJ15, RP11-525A16.4, SMOC1, PFKFB4, PHEX, MMP3, ETV4, LAMA1, RP1-90J20.8, AC004878.2, C2CD4A, IL24, GRIP2, MASP1, RP11-125O18.1, POPDC3, RP11-350J20.12, AMZ1, NRCAM, IL13RA2, FAM167A, LAMC3, MMP10, MUCL1, TEX29, IGHV3-66, RP11-426C22.4, TFAP2C, CTD-2545M3.8, TMEM190, FFAR3, DLG3-AS1, AMBP, ORM1, RNF175, AC024592.12, IL19, AC003092.1, NOTUM, SEPTIN3, ZNF295-AS1, ORM2, CPNE4, COL22A1, NELL1, RDH8, CFAP161, UCN2, RP11-64P14.7, RP11-993B23.3, RP11-495P10.6, LINC01050, PRL, RP11-18B16.2, LINC00922, RP11-417E7.1, XXbac-B33L19.4, C20orf141, AC005682.5, AC083884.8, D87007.1, GK-IT1, LL22NC03-N14H11.1, MT-TD, MT-TP, MT-TV, RP11-242C19.2, RP11-389C8.2, RP11-404P21.5, RP11-498E2.9, RP11-70J12.1, RP11-887P2.6, AC016722.2, AP000525.9, CTA-268H5.12, D86998.1, IGKV6D-41, RN7SL674P, RP11-183M13.1, RP11-554A11.4, RP11-810P8.1, RP11-82L18.2, RP5-916O11.2*

---

bulk DEGs

*IL13RA2, PTGS2, STC1, WNT5A, IL11, PII5, TNFRSF11B, CSGALNACT1, IL6, LILRB2, MNDA, TFPI2, TWIST1, CTHRC1, IL24, CXCR2, FCN1, TNFAIP6, CXCL6, TREM1, S100A9, C5AR1, G0S2, PTX3, SELE, NCF2, VNN2, FCGR3A, SLC2A3, PKIB, SLC2A14, FCGR3B, THBS2, S100A12, APOBEC3A, FPR2, GPR84, PROK2, CSF3R, CMTM2, S100A8, MMP1, BCL2A1, SELL, CCL3, IL1B, AQP9, MMP3, HCAR3, CXCL5, IRG1, MCEMP1, CNTN3, RETNLB, KLK10, CLCA1, ANXA10, UGT2A3, CLDN8, DEFA5*

---

192  
193  
194  
195  
196  
197  
198  
199  
200  
201

202 **Supplemental Table 2. Gene combinations identified by LASSO, RF, and SVM**  
 203 **respectively in Figure 5E.**

| <b>Algorithm</b> | <b>Gene combination</b>                                           |
|------------------|-------------------------------------------------------------------|
| LASSO            | <i>TWIST1, STC1, P115, CTHRC1, TNFRSF11B, IL11, MMP3, IL13RA2</i> |
| RF               | <i>IL11, IL13RA2, TWIST1, P115, IL24, TNFRSF11B, MMP1</i>         |
| SVM              | <i>IL11, P115, IL13RA2, STC1, TWIST1, TNFRSF11B, IL24</i>         |

204  
 205  
 206  
 207  
 208  
 209  
 210  
 211  
 212  
 213  
 214  
 215  
 216  
 217  
 218  
 219  
 220  
 221  
 222  
 223  
 224  
 225  
 226  
 227  
 228  
 229  
 230  
 231  
 232  
 233  
 234  
 235  
 236  
 237  
 238  
 239

240 **Supplemental Table 3. Clinical information of patients providing inflamed**  
 241 **intestinal specimens, related to Figure 6, C-H.**

| <b>Indicators</b>             | <b>NR (n = 23)</b>              | <b>R (n = 13)</b>              | <b>P-value</b> |
|-------------------------------|---------------------------------|--------------------------------|----------------|
| <b>Age (y/o)</b>              | 44.48 ± 11.58                   | 37.38 ± 10.69                  | 0.07           |
| <b>Gender</b>                 | Male (n = 15)<br>Female (n = 8) | Male (n = 9)<br>Female (n = 4) | 1.00           |
| <b>BMI (kg/m<sup>2</sup>)</b> | 20.33 ± 3.85                    | 19.10 ± 1.73                   | 0.20           |
| <b>ESR (mm/h)</b>             | 10.80 ± 13.99                   | 24.00 ± 27.39                  | 0.26           |
| <b>ALB (g/L)</b>              | 38.35 ± 5.90                    | 38.77 ± 10.09                  | 0.96           |
| <b>CRP (mg/L)</b>             | 17.54 ± 46.31                   | 7.74 ± 12.16                   | 0.64           |
| <b>Smoking history</b>        | yes (n = 2)<br>no (n = 21)      | yes (n = 0)<br>no (n = 13)     | 0.54           |

242 All continuous variables in this table are presented as mean ± SD. Statistical tests  
 243 employed include: Welch's t-test (Age, BMI), Wilcoxon rank-sum test (ESR, ALB,  
 244 CRP), and Fisher's exact test (Gender, Smoking history). y/o, years old.

245  
 246  
 247  
 248  
 249  
 250  
 251  
 252  
 253  
 254  
 255  
 256  
 257  
 258  
 259  
 260  
 261  
 262  
 263  
 264  
 265  
 266  
 267  
 268

**Supplemental Table 4. Primer sequences for qPCR.**

| <i>Gene</i>      | <i>Species</i> | <i>Forward primer</i>        | <i>Reverse primer</i>        |
|------------------|----------------|------------------------------|------------------------------|
| <i>IL11</i>      | Homo sapiens   | GGACCACAACCT<br>GGATTCCCTG   | AGTAGGTCCGCTCG<br>CAGCCTT    |
| <i>IL13RA2</i>   | Homo sapiens   | AACCTGGCATAG<br>GTGTACTTCTTG | CACACTGTAATGCA<br>TGATCCAAGC |
| <i>TNFRSF11B</i> | Homo sapiens   | CTGCGCGCTCGT<br>GTTTC        | ACAGCTGATGAGA<br>GGTTTCTTCGT |
| <i>TWIST1</i>    | Homo sapiens   | AGCTACGCCTTCT<br>CGGTCT      | CCTTCTCTGGAAAC<br>AATGACATC  |
| <i>PI15</i>      | Homo sapiens   | CAAGTACCGTCG<br>TCCTACTCA    | TCCGCTGAATCTAA<br>TTGTGCTT   |
| <i>GAPDH</i>     | Homo sapiens   | GGAGCGAGATCC<br>CTCCAAAAT    | GGCTGTTGTCATAC<br>TTCTCATGG  |
